# Supplementary material for: High internal phase Pickering emulsions stabilized by a cod protein–chitosan nanocomplex for astaxanthin delivery
Source: Royal Society of Chemistry journal article supplement (doi:10.1039/d1fo02117f), 2021-01-01
Supplement: d1fo02117f1.pdf [file d1fo02117f1.pdf]

**Electronic Supplementary Information (ESI)**

**High internal phase Pickering emulsions stabilized by cod protein-chitosan nanocomplex for astaxanthin delivery**

Lijuan Zhang,<sup>a,b,c</sup> Chengfu Zhou,<sup>a,b,c</sup> Xiaokang Na,<sup>a,b,c</sup> Yannan Chen<sup>a,b,c</sup> and Mingqian Tan<sup>a,b,c\*</sup>

*<sup>a</sup>Academy of Food Interdisciplinary Science, Food Science and Technology, Dalian Polytechnic University, Qinggongyuan 1, Ganjingzi District, Dalian 116034, Liaoning, China*

*<sup>b</sup>National Engineering Research Center of Seafood, Dalian Polytechnic University, Dalian 116034, Liaoning, China*

*<sup>c</sup>Collaborative Innovation Center of Seafood Deep Processing, Dalian Polytechnic University, Dalian 116034, Liaoning, China*

*\*To whom correspondence should be addressed. E-mail: [mqtan@dlpu.edu.cn](mailto:mqtan@dlpu.edu.cn), ORCID: 0000-0002-7535-0035. Qinggongyuan 1, Ganjingzi District, Dalian, 116034, Liaoning, PR China*

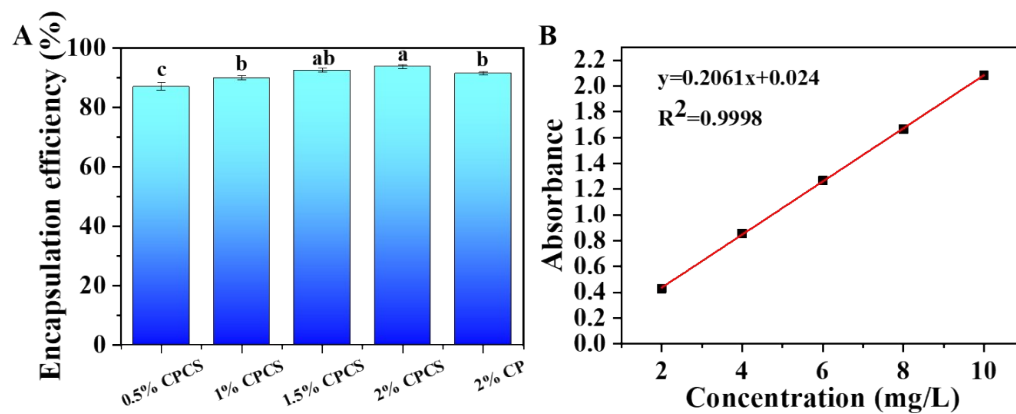

Figure S1. Encapsulation efficiency (A) of HIPPEs stabilized by nanocomplex of 0.5%, 1.0%, 1.5% and 2.0% cod protein (CP) with fixed 0.1% chitosan (CS) using the 2.0% CP as a control; Standard curve of astaxanthin (B).

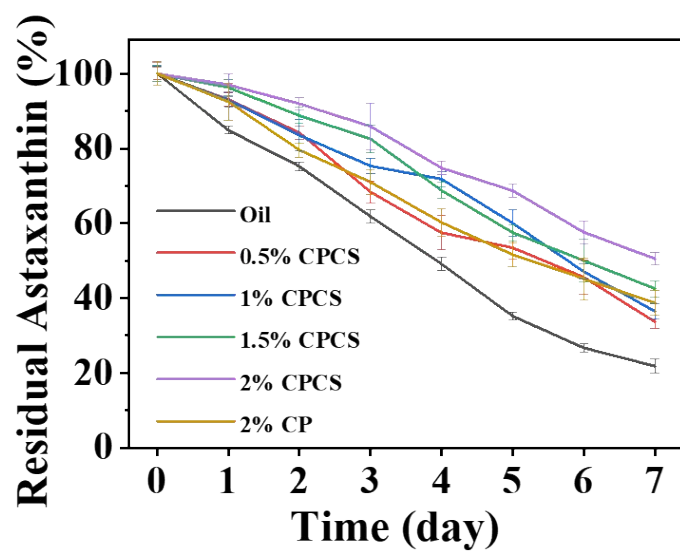

Figure S2. Residual astaxanthin levels in the HIPPEs stabilized by nanocomplex of 0.5%, 1.0%, 1.5% and 2.0% cod protein (CP) with fixed 0.1% chitosan (CS) using the 2.0% CP as a control at room temperature under the natural light.
